# Supplementary material
Source: MDPI journal article supplement (https://www.mdpi.com/2227-9717/10/5/955)
Supplement: s1 [file s1 › processes-1654105-supplementary.pdf]

## SUPPLEMENTARY SECTION

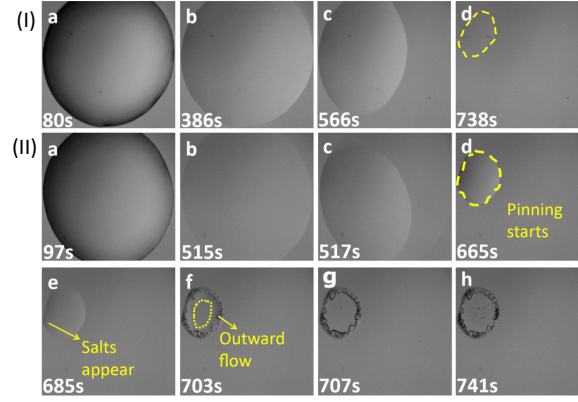

FIG. S1. Drying evolution of PBS drop at the initial concentration  $(\phi_{PBS})$  of (I) 0x and (II) 0.25x.

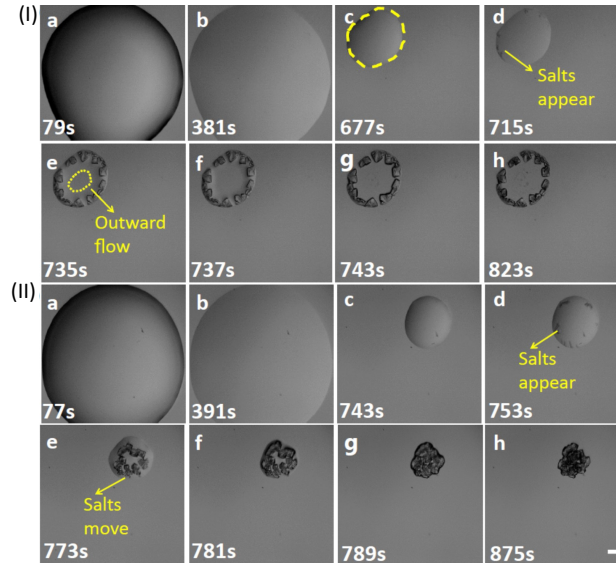

FIG. S2. Drying evolution of PBS drop at the initial concentration  $(\phi_{PBS})$  of (I) 0.5x, and (II) 0.75x. The scale bar of length 0.15 mm.

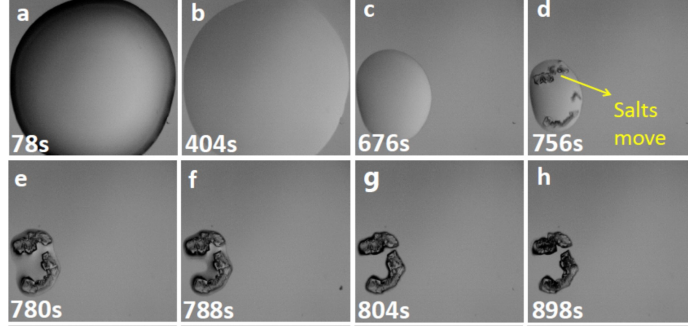

FIG. S3. Drying evolution of PBS drop at the initial concentration ( $\phi_{PBS}$ ) of 1x.

The pairwise comparisons using Wilcoxon rank sum test with continuity correction is given in Table S1, where the dependent variable is mean, and the independent variable is the initial concentration of PBS ( $\phi_{PBS}$ ). The concentration (x) has four levels (groups), i.e., 0.25, 0.5, 0.75, and 1. The statistical significance is determined when  $p < 0.05$ . The Bonferroni method is used for the p-value adjustment.

TABLE S1. Pairwise comparison of mean among all PBS concentrations ( $\phi_{PBS}$ ) for the drops at a fixed lysozyme initial concentration. These drops do not contain any liquid crystals (LCs).

| $\phi_{PBS}$ (x) | 0.25                  | 0.5                   | 0.75                  |
|------------------|-----------------------|-----------------------|-----------------------|
| 0.5              | $< 2 \times 10^{-16}$ | —                     | —                     |
| 0.75             | $< 2 \times 10^{-16}$ | $< 2 \times 10^{-13}$ | —                     |
| 1                | $< 2 \times 10^{-16}$ | $< 2 \times 10^{-16}$ | $< 2 \times 10^{-16}$ |

The pairwise comparisons using Wilcoxon rank sum test with continuity correction is given below, where the dependent variable is SD (standard deviation), and the independent variable is the initial concentration of PBS ( $\phi_{PBS}$ ). The concentration (x) has four levels (groups), i.e., 0.25, 0.5, 0.75, and 1. The statistical significance is determined when  $p < 0.05$ . The Bonferroni method is used for the p-value adjustment.

TABLE S2. Pairwise comparison of SD among all PBS concentrations ( $\phi_{PBS}$ ) for the drops at a fixed lysozyme initial concentration. These drops do not contain any liquid crystals (LCs).

| $\phi_{PBS}$ (x) | 0.25                  | 0.5                     | 0.75                   |
|------------------|-----------------------|-------------------------|------------------------|
| 0.5              | $< 2 \times 10^{-16}$ | —                       | —                      |
| 0.75             | $< 2 \times 10^{-16}$ | $< 5.9 \times 10^{-15}$ | —                      |
| 1                | $< 2 \times 10^{-16}$ | $< 2 \times 10^{-16}$   | $< 2.1 \times 10^{-9}$ |

TABLE S3. Pairwise comparison of mean among all PBS concentrations ( $\phi_{PBS}$ ) for the drops at a fixed lysozyme initial concentration. These drops contain liquid crystals (LCs).

| $\phi_{PBS}$ (x) | 0.25                  | 0.5                   | 0.75   |
|------------------|-----------------------|-----------------------|--------|
| 0.5              | $< 2 \times 10^{-16}$ | —                     | —      |
| 0.75             | $< 2 \times 10^{-16}$ | $< 2 \times 10^{-16}$ | —      |
| 1                | $< 2 \times 10^{-16}$ | $< 2 \times 10^{-16}$ | 0.0046 |

TABLE S4. Pairwise comparison of SD among all PBS concentrations ( $\phi_{PBS}$ ) for the drops at a fixed lysozyme initial concentration. These drops contain liquid crystals (LCs).

| $\phi_{PBS}$ (x) | 0.25                  | 0.5                   | 0.75                    |
|------------------|-----------------------|-----------------------|-------------------------|
| 0.5              | 0.0033                | —                     | —                       |
| 0.75             | $< 2 \times 10^{-16}$ | $< 2 \times 10^{-16}$ | —                       |
| 1                | $< 2 \times 10^{-16}$ | $< 2 \times 10^{-16}$ | $< 1.2 \times 10^{-10}$ |
